# Supplementary material for: HPV16 Down-Regulates the Insulin-Like Growth Factor Binding Protein 2 to Promote Epithelial Invasion in Organotypic Cultures
Source: PLOS journal article supplement (doi:10.1371/journal.ppat.1004988), 2015-06-24

Supplemental Figure 7

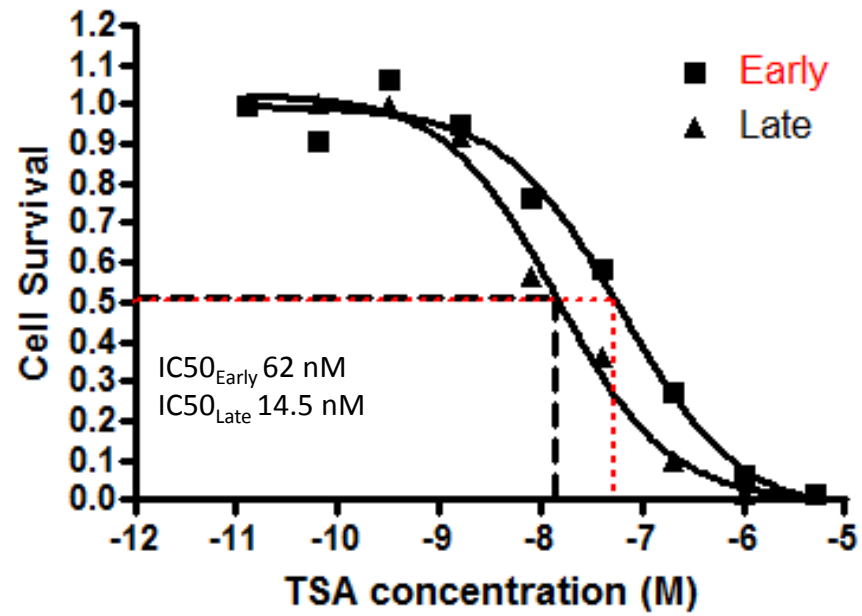

Supplement: S7 (10.1371/journal.ppat.1004988.s007) [file journal.ppat.1004988.s007]
